# Supplementary material for: TNFAIP8L3 regulation of the TGF-β signaling pathway affects the proportion of macrophages during tumor antigen presentation and affects the prognosis of ovarian cancer
Source: Front Mol Biosci. 2025 Apr 24;12:1566363. doi: 10.3389/fmolb.2025.1566363 (PMC12058474; doi:10.3389/fmolb.2025.1566363)
Supplement: Supplementary file 1 [file Table1.xlsx]

## Sheet: Sheet 1
id
TNFAIP8L3
ATP8B4
ARHGEF6
LILRA2
SYNE1
KLF2
C5AR1
NLRP12
CCDC69
OGFRL1
ARHGAP31
TACC1
TM6SF1
CD300LB
LILRA1
DAB2
MYO5A
GPRIN3
CD302
SH2B3
LIMA1
PIK3CG
GAPT
DOCK11
EPS8
SYTL4
WDR44
VASH1
NLRP3
DOCK8
ADAP2
ADRB2
AKNA
RAB31
TBXAS1
IL16
APBB1IP
CD93
AP4E1
TGFB1
CSF1R
ITGAM
RASGRP4
GPR34
ZEB2
ANO6
MEF2C
HTR7
PLEKHO2
STAB1
TLR7
TNFSF8
WDFY4
ADORA3
GAB3
TLR6
TLR4
PLPP1
SPPL2A
DOCK2
TLR1
CD180
SLC37A2
NEDD4
OLR1
HACD4
CDKN1A
THBD
GNG2
LAT2
PLD4
MS4A7
TBC1D2B
DOCK10
GLIPR1
ALOX5AP
EGR2
FGR
SMAP2
TMOD3
RCSD1
CSF2RA
ARHGAP18
GALNT10
RASGRP3
NCKAP1L
CD300A
TPM1
NR3C1
S1PR1
ARHGAP45
NIBAN1
SLC22A3
LSP1
STARD8
SVEP1
CXCR2
SLFN11
CX3CR1
FPR1
C3AR1
RASSF2
CEMIP2
TMOD2
SLCO2B1
MYO1E
TAGAP
EPB41L3
JAK1
FKBP5
SGK1
FAM78A
PTGFR
A2M
MYO1F
HMOX1
EPAS1
KCNMB1
MAP3K5
ITGA4
TGFBI
MNDA
SIGLEC9
SELE
FLI1
CYTH4
RUNX1
GAL3ST4
IL13RA1
ITGB2
APOBR
BTK
PIK3R5
RP2
CALHM2
SELP
ZNF609
P2RY12
MAN1A1
GIMAP8
TREM2
PECAM1
TNFRSF1B
IL10RA
MAP1A
NR4A3
BICC1
CD84
GPR183
HAVCR2
MAN2A1
TMEM52B
PCED1B
ARHGAP30
HPGDS
ITGAV
PLN
CD300C
VNN2
SNX30
LAPTM5
SLC9A9
LRRC8C
UQCC2
RPL35A
DNPH1
COMMD6
RPL37A
RPS21
RPS27
SNRPD2
RPL28
PFDN2
RNF5
NME1
PMF1
CUTA
RPS20
EEF1AKMT4
RPL36
MRPL2
