# Supplementary material for: TNFAIP8L3 regulation of the TGF-β signaling pathway affects the proportion of macrophages during tumor antigen presentation and affects the prognosis of ovarian cancer
Source: Front Mol Biosci. 2025 Apr 24;12:1566363. doi: 10.3389/fmolb.2025.1566363 (PMC12058474; doi:10.3389/fmolb.2025.1566363)
Supplement: Supplementary file 2 [file Table2.xlsx]

## Sheet: Supplementary Table 2
#node1	node2	node1_string_id	node2_string_id	neighborhood_on_chromosome	gene_fusion	phylogenetic_cooccurrence	homology	coexpression	experimentally_determined_interaction	database_annotated	automated_textmining	combined_score
A2M	TGFB1	9606.ENSP00000323929	9606.ENSP00000221930	0	0	0	0	0	0.045	0	0.91	0.91
A2M	THBD	9606.ENSP00000323929	9606.ENSP00000366307	0	0	0	0	0.062	0	0	0.402	0.415
ADAP2	CSF1R	9606.ENSP00000464121	9606.ENSP00000286301	0	0	0	0	0.528	0	0	0.081	0.547
ADORA3	TREM2	9606.ENSP00000241356	9606.ENSP00000362205	0	0	0	0	0.271	0	0	0.221	0.408
ADORA3	P2RY12	9606.ENSP00000241356	9606.ENSP00000307259	0	0	0	0	0.111	0	0	0.447	0.487
ADORA3	FPR1	9606.ENSP00000241356	9606.ENSP00000471493	0	0	0	0	0.086	0	0	0.469	0.493
ADORA3	C3AR1	9606.ENSP00000241356	9606.ENSP00000302079	0	0	0	0	0.142	0	0	0.474	0.529
ADORA3	C5AR1	9606.ENSP00000241356	9606.ENSP00000347197	0	0	0	0	0.095	0	0	0.512	0.539
ADORA3	GPR34	9606.ENSP00000241356	9606.ENSP00000367384	0	0	0	0	0.461	0	0	0.422	0.675
ADRB2	NR3C1	9606.ENSP00000305372	9606.ENSP00000231509	0	0	0	0	0.102	0	0	0.709	0.727
ADRB2	ARHGEF6	9606.ENSP00000305372	9606.ENSP00000250617	0	0	0	0	0.054	0	0	0.429	0.436
ADRB2	KCNMB1	9606.ENSP00000305372	9606.ENSP00000274629	0	0	0	0	0.059	0	0	0.467	0.477
ADRB2	TNFRSF1B	9606.ENSP00000305372	9606.ENSP00000365435	0	0	0	0	0.078	0	0	0.428	0.45
ADRB2	P2RY12	9606.ENSP00000305372	9606.ENSP00000307259	0	0	0	0	0	0	0	0.463	0.463
ADRB2	GNG2	9606.ENSP00000305372	9606.ENSP00000334448	0	0	0	0	0.049	0.457	0	0.063	0.474
ADRB2	DAB2	9606.ENSP00000305372	9606.ENSP00000313391	0	0	0	0	0.052	0	0.5	0.092	0.532
ADRB2	NEDD4	9606.ENSP00000305372	9606.ENSP00000424827	0	0	0	0	0	0.51	0	0.639	0.815
ALOX5AP	LAPTM5	9606.ENSP00000479870	9606.ENSP00000294507	0	0	0	0	0.551	0	0	0.255	0.651
ALOX5AP	MNDA	9606.ENSP00000479870	9606.ENSP00000357123	0	0	0	0	0.365	0	0	0.167	0.448
ALOX5AP	FGR	9606.ENSP00000479870	9606.ENSP00000363117	0	0	0	0	0.352	0	0	0.177	0.444
ALOX5AP	ITGB2	9606.ENSP00000479870	9606.ENSP00000380948	0	0	0	0	0.476	0	0	0.232	0.58
ALOX5AP	TBXAS1	9606.ENSP00000479870	9606.ENSP00000389414	0	0	0	0	0.195	0	0	0.432	0.523
ALOX5AP	FPR1	9606.ENSP00000479870	9606.ENSP00000471493	0	0	0	0	0.35	0	0	0.213	0.466
ALOX5AP	ITGAM	9606.ENSP00000479870	9606.ENSP00000496959	0	0	0	0	0.33	0	0	0.221	0.456
AP4E1	SPPL2A	9606.ENSP00000261842	9606.ENSP00000261854	0	0	0	0	0.062	0	0	0.534	0.545
APBB1IP	CYTH4	9606.ENSP00000365411	9606.ENSP00000248901	0	0	0	0	0.378	0	0	0.187	0.473
APBB1IP	NCKAP1L	9606.ENSP00000365411	9606.ENSP00000293373	0	0	0	0	0.294	0	0	0.422	0.574
APBB1IP	LAPTM5	9606.ENSP00000365411	9606.ENSP00000294507	0	0	0	0	0.492	0	0	0.083	0.514
APBB1IP	C5AR1	9606.ENSP00000365411	9606.ENSP00000347197	0	0	0	0	0.109	0	0	0.373	0.418
APBB1IP	FGR	9606.ENSP00000365411	9606.ENSP00000363117	0	0	0	0	0.252	0.092	0	0.202	0.411
APBB1IP	DOCK8	9606.ENSP00000365411	9606.ENSP00000394888	0	0	0	0	0.302	0	0	0.188	0.409
APBB1IP	BTK	9606.ENSP00000365411	9606.ENSP00000483570	0	0	0	0	0.325	0.092	0	0.166	0.445
APBB1IP	DOCK2	9606.ENSP00000365411	9606.ENSP00000429283	0	0	0	0	0.446	0	0	0.336	0.617
APBB1IP	ITGB2	9606.ENSP00000365411	9606.ENSP00000380948	0	0	0	0	0.408	0	0	0.585	0.743
APOBR	MS4A7	9606.ENSP00000457539	9606.ENSP00000300184	0	0	0.424	0	0.202	0	0	0	0.52
APOBR	MYO1F	9606.ENSP00000457539	9606.ENSP00000494550	0	0	0	0	0.497	0	0	0.215	0.588
ARHGAP30	IL10RA	9606.ENSP00000356992	9606.ENSP00000227752	0	0	0	0	0.393	0	0	0.103	0.432
ARHGAP30	CYTH4	9606.ENSP00000356992	9606.ENSP00000248901	0	0	0	0	0.381	0	0	0.269	0.528
ARHGAP30	NCKAP1L	9606.ENSP00000356992	9606.ENSP00000293373	0	0	0	0	0.514	0	0	0.312	0.651
ARHGAP30	LAPTM5	9606.ENSP00000356992	9606.ENSP00000294507	0	0	0	0	0.474	0	0	0.298	0.615
ARHGAP30	IL16	9606.ENSP00000356992	9606.ENSP00000302935	0	0	0	0	0.414	0	0	0.155	0.484
ARHGAP30	ITGB2	9606.ENSP00000356992	9606.ENSP00000380948	0	0	0	0	0.432	0	0	0.051	0.438
ARHGAP30	FAM78A	9606.ENSP00000356992	9606.ENSP00000361345	0	0	0	0	0.126	0	0	0.448	0.497
ARHGAP30	DOCK2	9606.ENSP00000356992	9606.ENSP00000429283	0	0	0	0	0.38	0.091	0	0.185	0.501
ARHGAP30	MYO1F	9606.ENSP00000356992	9606.ENSP00000494550	0	0	0	0	0.49	0	0	0.138	0.542
ARHGAP31	ZEB2	9606.ENSP00000264245	9606.ENSP00000487174	0	0	0	0	0.084	0	0	0.832	0.839
ARHGEF6	DOCK11	9606.ENSP00000250617	9606.ENSP00000276202	0	0	0	0	0.329	0	0	0.193	0.436
ARHGEF6	DOCK2	9606.ENSP00000250617	9606.ENSP00000429283	0	0	0	0	0.263	0	0	0.335	0.489
ARHGEF6	GNG2	9606.ENSP00000250617	9606.ENSP00000334448	0	0	0	0	0.074	0	0.5	0	0.517
BICC1	TACC1	9606.ENSP00000362993	9606.ENSP00000321703	0	0	0	0	0	0.067	0	0.48	0.494
BTK	IL10RA	9606.ENSP00000483570	9606.ENSP00000227752	0	0	0	0	0.292	0	0	0.223	0.427
BTK	CD180	9606.ENSP00000483570	9606.ENSP00000256447	0	0	0	0	0.289	0.1	0	0.419	0.596
BTK	NCKAP1L	9606.ENSP00000483570	9606.ENSP00000293373	0	0	0	0	0.495	0.092	0	0.382	0.691
BTK	LAPTM5	9606.ENSP00000483570	9606.ENSP00000294507	0	0	0	0	0.461	0	0	0.418	0.672
BTK	WDFY4	9606.ENSP00000483570	9606.ENSP00000320563	0	0	0	0	0.465	0.071	0	0.076	0.501
BTK	GNG2	9606.ENSP00000483570	9606.ENSP00000334448	0	0	0	0	0.061	0.095	0.5	0.058	0.546
BTK	NLRP3	9606.ENSP00000483570	9606.ENSP00000337383	0	0	0	0	0.106	0.1	0	0.859	0.876
BTK	CD300A	9606.ENSP00000483570	9606.ENSP00000353259	0	0	0	0	0.297	0.058	0	0.203	0.426
BTK	TLR1	9606.ENSP00000483570	9606.ENSP00000354932	0	0	0	0	0.265	0.1	0	0.249	0.46
BTK	MNDA	9606.ENSP00000483570	9606.ENSP00000357123	0	0	0	0	0.354	0	0	0.121	0.408
BTK	PTGFR	9606.ENSP00000483570	9606.ENSP00000359793	0	0	0	0	0	0	0.5	0	0.499
BTK	TREM2	9606.ENSP00000483570	9606.ENSP00000362205	0	0	0	0	0.088	0	0.5	0.204	0.605
BTK	TLR4	9606.ENSP00000483570	9606.ENSP00000363089	0	0	0	0	0.165	0.277	0	0.743	0.831
BTK	FGR	9606.ENSP00000483570	9606.ENSP00000363117	0	0	0.108	0.838	0.326	0	0	0.112	0.42
BTK	TLR7	9606.ENSP00000483570	9606.ENSP00000370034	0	0	0	0	0.304	0.1	0	0.665	0.772
BTK	ITGA4	9606.ENSP00000483570	9606.ENSP00000380227	0	0	0	0	0.168	0.058	0	0.323	0.423
BTK	ITGB2	9606.ENSP00000483570	9606.ENSP00000380948	0	0	0	0	0.372	0.052	0	0.317	0.558
BTK	LAT2	9606.ENSP00000483570	9606.ENSP00000381492	0	0	0	0	0.306	0	0	0.356	0.534
BTK	TLR6	9606.ENSP00000483570	9606.ENSP00000389600	0	0	0	0	0.132	0.277	0	0.51	0.665
BTK	PIK3R5	9606.ENSP00000483570	9606.ENSP00000392812	0	0	0	0	0.269	0	0	0.307	0.471
BTK	DOCK8	9606.ENSP00000483570	9606.ENSP00000394888	0	0	0	0	0.21	0	0	0.366	0.477
BTK	PIK3CG	9606.ENSP00000483570	9606.ENSP00000419260	0	0	0	0	0.262	0.069	0	0.551	0.665
BTK	DOCK2	9606.ENSP00000483570	9606.ENSP00000429283	0	0	0	0	0.381	0.045	0	0.224	0.501
BTK	FPR1	9606.ENSP00000483570	9606.ENSP00000471493	0	0	0	0	0.118	0	0	0.409	0.456
BTK	JAK1	9606.ENSP00000483570	9606.ENSP00000499900	0	0	0	0.607	0.093	0.292	0	0.223	0.457
BTK	ITGAM	9606.ENSP00000483570	9606.ENSP00000496959	0	0	0	0	0.281	0.058	0	0.35	0.521
C3AR1	IL10RA	9606.ENSP00000302079	9606.ENSP00000227752	0	0	0	0	0.272	0	0	0.235	0.419
C3AR1	CD93	9606.ENSP00000302079	9606.ENSP00000246006	0	0	0	0	0.21	0.049	0	0.629	0.696
C3AR1	SELP	9606.ENSP00000302079	9606.ENSP00000263686	0	0	0	0	0.119	0	0	0.57	0.605
C3AR1	CSF1R	9606.ENSP00000302079	9606.ENSP00000286301	0	0	0	0	0.409	0	0	0.601	0.754
C3AR1	LAPTM5	9606.ENSP00000302079	9606.ENSP00000294507	0	0	0	0	0.348	0	0	0.263	0.499
C3AR1	MS4A7	9606.ENSP00000302079	9606.ENSP00000300184	0	0	0	0	0.421	0	0	0.047	0.425
C3AR1	NLRP3	9606.ENSP00000302079	9606.ENSP00000337383	0	0	0	0	0.156	0	0	0.323	0.404
C3AR1	TLR7	9606.ENSP00000302079	9606.ENSP00000370034	0	0	0	0	0.162	0	0	0.321	0.406
C3AR1	SIGLEC9	9606.ENSP00000302079	9606.ENSP00000413861	0	0	0	0	0.338	0.098	0	0.104	0.418
C3AR1	TLR1	9606.ENSP00000302079	9606.ENSP00000354932	0	0	0	0	0.282	0	0	0.27	0.453
C3AR1	MNDA	9606.ENSP00000302079	9606.ENSP00000357123	0	0	0	0	0.352	0	0	0.197	0.458
C3AR1	GNG2	9606.ENSP00000302079	9606.ENSP00000334448	0	0	0	0	0.072	0.12	0	0.423	0.487
C3AR1	TREM2	9606.ENSP00000302079	9606.ENSP00000362205	0	0	0	0	0.239	0	0	0.418	0.538
C3AR1	TLR4	9606.ENSP00000302079	9606.ENSP00000363089	0	0	0	0	0.346	0	0	0.42	0.605
C3AR1	HAVCR2	9606.ENSP00000302079	9606.ENSP00000312002	0	0	0	0	0.246	0.091	0	0.481	0.613
C3AR1	ITGAM	9606.ENSP00000302079	9606.ENSP00000496959	0	0	0	0	0.354	0	0	0.613	0.739
C3AR1	ITGB2	9606.ENSP00000302079	9606.ENSP00000380948	0	0	0	0	0.34	0	0	0.69	0.786
C3AR1	FPR1	9606.ENSP00000302079	9606.ENSP00000471493	0	0	0.078	0.765	0.252	0	0.5	0.467	0.791
C3AR1	C5AR1	9606.ENSP00000302079	9606.ENSP00000347197	0	0	0	0.811	0.246	0	0.5	0.97	0.987
C5AR1	CD93	9606.ENSP00000347197	9606.ENSP00000246006	0	0	0	0	0.211	0.049	0	0.643	0.708
C5AR1	SELP	9606.ENSP00000347197	9606.ENSP00000263686	0	0	0	0	0.093	0	0	0.607	0.628
C5AR1	CSF1R	9606.ENSP00000347197	9606.ENSP00000286301	0	0	0	0	0.224	0	0	0.363	0.485
C5AR1	S1PR1	9606.ENSP00000347197	9606.ENSP00000305416	0	0	0	0	0.082	0	0	0.405	0.43
C5AR1	HAVCR2	9606.ENSP00000347197	9606.ENSP00000312002	0	0	0	0	0.103	0.091	0	0.457	0.518
C5AR1	CXCR2	9606.ENSP00000347197	9606.ENSP00000319635	0	0	0	0.711	0.242	0	0.5	0.474	0.783
C5AR1	NLRP3	9606.ENSP00000347197	9606.ENSP00000337383	0	0	0	0	0.186	0	0	0.37	0.465
C5AR1	TLR1	9606.ENSP00000347197	9606.ENSP00000354932	0	0	0	0	0.214	0	0	0.28	0.41
C5AR1	THBD	9606.ENSP00000347197	9606.ENSP00000366307	0	0	0	0	0.183	0.049	0	0.35	0.45
C5AR1	MYO1F	9606.ENSP00000347197	9606.ENSP00000494550	0	0	0	0	0.47	0	0	0	0.47
C5AR1	CX3CR1	9606.ENSP00000347197	9606.ENSP00000351059	0	0	0	0.677	0.138	0	0	0.449	0.504
C5AR1	FGR	9606.ENSP00000347197	9606.ENSP00000363117	0	0	0	0	0.448	0	0	0.168	0.522
C5AR1	ITGB2	9606.ENSP00000347197	9606.ENSP00000380948	0	0	0	0	0.258	0	0	0.493	0.608
C5AR1	TLR4	9606.ENSP00000347197	9606.ENSP00000363089	0	0	0	0	0.356	0	0	0.541	0.691
C5AR1	ITGAM	9606.ENSP00000347197	9606.ENSP00000496959	0	0	0	0	0.344	0	0	0.74	0.822
C5AR1	FPR1	9606.ENSP00000347197	9606.ENSP00000471493	0	0	0.073	0.804	0.393	0	0.5	0.465	0.829
CCDC69	RCSD1	9606.ENSP00000347586	9606.ENSP00000356828	0	0	0	0	0.335	0	0	0.196	0.442
CD180	CD84	9606.ENSP00000256447	9606.ENSP00000312367	0	0	0	0	0.278	0.095	0	0.318	0.516
CD180	TLR7	9606.ENSP00000256447	9606.ENSP00000370034	0	0	0	0.56	0.441	0	0	0.187	0.527
CD180	ITGAM	9606.ENSP00000256447	9606.ENSP00000496959	0	0	0	0	0.132	0.05	0	0.476	0.53
CD180	TLR1	9606.ENSP00000256447	9606.ENSP00000354932	0	0	0	0	0.16	0	0	0.507	0.568
CD180	TLR4	9606.ENSP00000256447	9606.ENSP00000363089	0	0	0.121	0.685	0.148	0	0.4	0.813	0.904
CD300A	IL10RA	9606.ENSP00000353259	9606.ENSP00000227752	0	0	0	0	0.348	0	0	0.181	0.443
CD300A	LILRA1	9606.ENSP00000353259	9606.ENSP00000251372	0	0	0	0	0.285	0.067	0	0.202	0.421
CD300A	CSF1R	9606.ENSP00000353259	9606.ENSP00000286301	0	0	0	0	0.226	0	0	0.449	0.555
CD300A	LAPTM5	9606.ENSP00000353259	9606.ENSP00000294507	0	0	0	0	0.401	0	0	0.109	0.444
CD300A	RUNX1	9606.ENSP00000353259	9606.ENSP00000300305	0	0	0	0	0.042	0	0	0.4	0.4
CD300A	HAVCR2	9606.ENSP00000353259	9606.ENSP00000312002	0	0	0.222	0	0.183	0.067	0	0.305	0.532
CD300A	CD84	9606.ENSP00000353259	9606.ENSP00000312367	0	0	0	0	0.204	0	0	0.299	0.418
CD300A	STAB1	9606.ENSP00000353259	9606.ENSP00000312946	0	0	0	0	0.144	0	0	0.459	0.517
CD300A	CD300C	9606.ENSP00000353259	9606.ENSP00000329507	0	0	0.055	0.946	0.352	0.292	0.4	0.087	0.719
CD300A	CX3CR1	9606.ENSP00000353259	9606.ENSP00000351059	0	0	0	0	0.243	0	0	0.264	0.419
CD300A	SIGLEC9	9606.ENSP00000353259	9606.ENSP00000413861	0	0	0	0	0.328	0.071	0	0.228	0.476
CD300A	FGR	9606.ENSP00000353259	9606.ENSP00000363117	0	0	0	0	0.404	0.058	0	0.183	0.502
CD300A	MNDA	9606.ENSP00000353259	9606.ENSP00000357123	0	0	0	0	0.469	0	0	0.102	0.503
CD300A	ITGAM	9606.ENSP00000353259	9606.ENSP00000496959	0	0	0	0	0.421	0	0	0.275	0.563
CD300A	TREM2	9606.ENSP00000353259	9606.ENSP00000362205	0	0	0	0	0.158	0	0.4	0.215	0.569
CD300A	ITGB2	9606.ENSP00000353259	9606.ENSP00000380948	0	0	0	0	0.415	0.114	0	0.286	0.598
CD300A	CD300LB	9606.ENSP00000353259	9606.ENSP00000376397	0	0	0	0.803	0.329	0.51	0.4	0.202	0.821
CD300C	LILRA1	9606.ENSP00000329507	9606.ENSP00000251372	0	0	0	0	0.419	0.067	0	0.789	0.875
CD300C	MAP1A	9606.ENSP00000329507	9606.ENSP00000300231	0	0	0	0	0	0	0	0.912	0.912
CD300C	HAVCR2	9606.ENSP00000329507	9606.ENSP00000312002	0	0	0.205	0	0.247	0.067	0	0.079	0.416
CD300C	ITGB2	9606.ENSP00000329507	9606.ENSP00000380948	0	0	0	0	0.332	0.114	0	0.104	0.423
CD300C	NLRP3	9606.ENSP00000329507	9606.ENSP00000337383	0	0	0	0	0.288	0.05	0	0.247	0.446
CD300C	TREM2	9606.ENSP00000329507	9606.ENSP00000362205	0	0	0	0	0.178	0	0.4	0.074	0.503
CD300C	SIGLEC9	9606.ENSP00000329507	9606.ENSP00000413861	0	0	0.201	0	0.433	0.071	0	0.135	0.587
CD300C	CD300LB	9606.ENSP00000329507	9606.ENSP00000376397	0	0	0.072	0.815	0.768	0.51	0.4	0.185	0.939
CD300C	LILRA2	9606.ENSP00000329507	9606.ENSP00000375618	0	0	0	0	0.423	0.067	0	0.915	0.95
CD300LB	LILRA1	9606.ENSP00000376397	9606.ENSP00000251372	0	0	0	0	0.478	0.067	0	0.185	0.568
CD300LB	STAB1	9606.ENSP00000376397	9606.ENSP00000312946	0	0	0	0	0.156	0	0	0.412	0.483
CD300LB	MNDA	9606.ENSP00000376397	9606.ENSP00000357123	0	0	0	0	0.499	0	0	0.091	0.525
CD300LB	TREM2	9606.ENSP00000376397	9606.ENSP00000362205	0	0	0	0	0.146	0	0.4	0.398	0.664
CD300LB	FGR	9606.ENSP00000376397	9606.ENSP00000363117	0	0	0	0	0.41	0.058	0	0.044	0.422
CD300LB	ITGAM	9606.ENSP00000376397	9606.ENSP00000496959	0	0	0	0	0.307	0	0	0.186	0.412
CD84	NCKAP1L	9606.ENSP00000312367	9606.ENSP00000293373	0	0	0	0	0.551	0	0	0.156	0.605
CD84	TLR7	9606.ENSP00000312367	9606.ENSP00000370034	0	0	0	0	0.211	0.095	0	0.264	0.429
CD84	ITGB2	9606.ENSP00000312367	9606.ENSP00000380948	0	0	0	0	0.252	0.045	0	0.274	0.437
CD93	MNDA	9606.ENSP00000246006	9606.ENSP00000357123	0	0	0	0	0.331	0	0	0.149	0.406
CD93	THBD	9606.ENSP00000246006	9606.ENSP00000366307	0	0	0	0.658	0.348	0	0	0.168	0.435
CD93	GIMAP8	9606.ENSP00000246006	9606.ENSP00000305107	0	0	0	0	0.401	0.1	0	0	0.438
CD93	OLR1	9606.ENSP00000246006	9606.ENSP00000309124	0	0	0	0	0.06	0.101	0	0.427	0.473
CD93	TLR4	9606.ENSP00000246006	9606.ENSP00000363089	0	0	0	0	0.249	0.125	0	0.284	0.488
CD93	SELE	9606.ENSP00000246006	9606.ENSP00000331736	0	0	0	0	0.109	0.101	0	0.435	0.507
CD93	SELP	9606.ENSP00000246006	9606.ENSP00000263686	0	0	0	0	0.193	0.101	0	0.397	0.524
CD93	STAB1	9606.ENSP00000246006	9606.ENSP00000312946	0	0	0	0	0.388	0.045	0	0.253	0.526
CD93	CSF1R	9606.ENSP00000246006	9606.ENSP00000286301	0	0	0	0	0.373	0	0	0.29	0.536
CD93	ITGB2	9606.ENSP00000246006	9606.ENSP00000380948	0	0	0	0	0.199	0.067	0	0.571	0.651
CD93	ITGAM	9606.ENSP00000246006	9606.ENSP00000496959	0	0	0	0	0.243	0.045	0	0.599	0.684
CD93	PECAM1	9606.ENSP00000246006	9606.ENSP00000457421	0	0	0	0	0.512	0.107	0	0.562	0.792
CDKN1A	HMOX1	9606.ENSP00000384849	9606.ENSP00000216117	0	0	0	0	0.144	0	0	0.413	0.476
CDKN1A	TGFB1	9606.ENSP00000384849	9606.ENSP00000221930	0	0	0	0	0.118	0	0	0.571	0.605
CDKN1A	RUNX1	9606.ENSP00000384849	9606.ENSP00000300305	0	0	0	0	0.044	0	0	0.477	0.478
CDKN1A	MAP3K5	9606.ENSP00000384849	9606.ENSP00000351908	0	0	0	0	0.098	0.292	0.9	0.589	0.97
CDKN1A	NEDD4	9606.ENSP00000384849	9606.ENSP00000424827	0	0	0	0	0	0.292	0	0.2	0.409
CDKN1A	JAK1	9606.ENSP00000384849	9606.ENSP00000499900	0	0	0	0	0.091	0.047	0	0.535	0.562
COMMD6	EPAS1	9606.ENSP00000348054	9606.ENSP00000263734	0	0	0	0	0	0	0.5	0	0.499
COMMD6	RPL35A	9606.ENSP00000348054	9606.ENSP00000495672	0	0	0	0	0.379	0	0	0.147	0.448
CSF1R	TGFB1	9606.ENSP00000286301	9606.ENSP00000221930	0	0	0	0	0.124	0.063	0	0.511	0.564
CSF1R	IL10RA	9606.ENSP00000286301	9606.ENSP00000227752	0	0	0	0	0.413	0	0	0.533	0.714
CSF1R	CYTH4	9606.ENSP00000286301	9606.ENSP00000248901	0	0	0	0	0.399	0	0	0.055	0.408
CSF1R	ITGAV	9606.ENSP00000286301	9606.ENSP00000261023	0	0	0	0	0.065	0.292	0	0.29	0.489
CSF1R	TNFRSF1B	9606.ENSP00000286301	9606.ENSP00000365435	0	0	0	0	0.199	0	0	0.29	0.407
CSF1R	TLR1	9606.ENSP00000286301	9606.ENSP00000354932	0	0	0	0	0.257	0.064	0	0.237	0.423
CSF1R	NLRP3	9606.ENSP00000286301	9606.ENSP00000337383	0	0	0	0	0.248	0.064	0	0.258	0.432
CSF1R	NCKAP1L	9606.ENSP00000286301	9606.ENSP00000293373	0	0	0	0	0.368	0	0	0.147	0.438
CSF1R	FGR	9606.ENSP00000286301	9606.ENSP00000363117	0	0	0	0.671	0.351	0.074	0	0.146	0.442
CSF1R	TGFBI	9606.ENSP00000286301	9606.ENSP00000416330	0	0	0	0	0.303	0	0	0.233	0.443
CSF1R	PLD4	9606.ENSP00000286301	9606.ENSP00000438677	0	0	0	0	0.357	0	0	0.174	0.446
CSF1R	FPR1	9606.ENSP00000286301	9606.ENSP00000471493	0	0	0	0	0.349	0	0	0.203	0.459
CSF1R	MNDA	9606.ENSP00000286301	9606.ENSP00000357123	0	0	0	0	0.372	0	0	0.176	0.46
CSF1R	MYO1F	9606.ENSP00000286301	9606.ENSP00000494550	0	0	0	0	0.437	0	0	0.13	0.489
CSF1R	LAPTM5	9606.ENSP00000286301	9606.ENSP00000294507	0	0	0	0	0.373	0	0	0.307	0.547
CSF1R	GPR34	9606.ENSP00000286301	9606.ENSP00000367384	0	0	0	0	0.246	0	0	0.467	0.581
CSF1R	CXCR2	9606.ENSP00000286301	9606.ENSP00000319635	0	0	0	0	0.141	0	0	0.541	0.589
CSF1R	STAB1	9606.ENSP00000286301	9606.ENSP00000312946	0	0	0	0	0.427	0	0	0.322	0.595
CSF1R	TLR7	9606.ENSP00000286301	9606.ENSP00000370034	0	0	0	0	0.308	0.064	0	0.426	0.596
CSF1R	HAVCR2	9606.ENSP00000286301	9606.ENSP00000312002	0	0	0	0	0.282	0.045	0	0.481	0.613
CSF1R	MS4A7	9606.ENSP00000286301	9606.ENSP00000300184	0	0	0	0	0.677	0	0	0.182	0.724
CSF1R	PECAM1	9606.ENSP00000286301	9606.ENSP00000457421	0	0	0	0	0.421	0.045	0	0.542	0.725
CSF1R	P2RY12	9606.ENSP00000286301	9606.ENSP00000307259	0	0	0	0	0.182	0	0	0.714	0.756
CSF1R	PIK3CG	9606.ENSP00000286301	9606.ENSP00000419260	0	0	0	0	0.14	0.087	0.5	0.455	0.757
CSF1R	CSF2RA	9606.ENSP00000286301	9606.ENSP00000394227	0	0	0	0	0.256	0.049	0	0.695	0.765
CSF1R	GAB3	9606.ENSP00000286301	9606.ENSP00000399588	0	0	0	0	0.129	0	0.5	0.519	0.772
CSF1R	TLR4	9606.ENSP00000286301	9606.ENSP00000363089	0	0	0	0	0.296	0.064	0	0.72	0.8
CSF1R	CX3CR1	9606.ENSP00000286301	9606.ENSP00000351059	0	0	0	0	0.305	0	0	0.774	0.836
CSF1R	TREM2	9606.ENSP00000286301	9606.ENSP00000362205	0	0	0	0	0.296	0	0	0.805	0.857
CSF1R	ITGB2	9606.ENSP00000286301	9606.ENSP00000380948	0	0	0	0	0.513	0.063	0	0.722	0.862
CSF1R	ITGAM	9606.ENSP00000286301	9606.ENSP00000496959	0	0	0	0	0.345	0	0	0.802	0.865
CSF1R	RUNX1	9606.ENSP00000286301	9606.ENSP00000300305	0	0	0	0	0.09	0.423	0.9	0.728	0.983
CSF2RA	IL10RA	9606.ENSP00000394227	9606.ENSP00000227752	0	0	0	0	0.14	0	0	0.331	0.4
CSF2RA	TLR4	9606.ENSP00000394227	9606.ENSP00000363089	0	0	0	0	0.216	0	0	0.418	0.524
CSF2RA	JAK1	9606.ENSP00000394227	9606.ENSP00000499900	0	0	0	0	0.056	0.077	0.4	0.196	0.523
CSF2RA	ITGAM	9606.ENSP00000394227	9606.ENSP00000496959	0	0	0	0	0.172	0	0	0.614	0.666
CX3CR1	TGFB1	9606.ENSP00000351059	9606.ENSP00000221930	0	0	0	0	0	0.069	0	0.476	0.491
CX3CR1	IL10RA	9606.ENSP00000351059	9606.ENSP00000227752	0	0	0	0	0.17	0	0	0.398	0.479
CX3CR1	NR3C1	9606.ENSP00000351059	9606.ENSP00000231509	0	0	0	0	0.069	0	0	0.551	0.564
CX3CR1	SELP	9606.ENSP00000351059	9606.ENSP00000263686	0	0	0	0	0.141	0	0	0.402	0.464
CX3CR1	S1PR1	9606.ENSP00000351059	9606.ENSP00000305416	0	0	0	0	0.083	0	0	0.396	0.422
CX3CR1	P2RY12	9606.ENSP00000351059	9606.ENSP00000307259	0	0	0	0.607	0.201	0	0	0.55	0.625
CX3CR1	HAVCR2	9606.ENSP00000351059	9606.ENSP00000312002	0	0	0	0	0.087	0.091	0	0.431	0.486
CX3CR1	STAB1	9606.ENSP00000351059	9606.ENSP00000312946	0	0	0	0	0.086	0	0	0.55	0.571
CX3CR1	CXCR2	9606.ENSP00000351059	9606.ENSP00000319635	0	0	0	0.796	0.097	0	0.5	0.462	0.735
CX3CR1	SELE	9606.ENSP00000351059	9606.ENSP00000331736	0	0	0	0	0.099	0	0	0.373	0.411
CX3CR1	GNG2	9606.ENSP00000351059	9606.ENSP00000334448	0	0	0	0	0.073	0.816	0	0.091	0.831
CX3CR1	FPR1	9606.ENSP00000351059	9606.ENSP00000471493	0	0	0	0.698	0.092	0	0	0.428	0.458
CX3CR1	PECAM1	9606.ENSP00000351059	9606.ENSP00000457421	0	0	0	0	0.086	0.091	0	0.487	0.537
CX3CR1	ITGB2	9606.ENSP00000351059	9606.ENSP00000380948	0	0	0	0	0.203	0	0	0.447	0.54
CX3CR1	TLR7	9606.ENSP00000351059	9606.ENSP00000370034	0	0	0	0	0.253	0	0	0.433	0.558
CX3CR1	ITGA4	9606.ENSP00000351059	9606.ENSP00000380227	0	0	0	0	0.083	0.292	0	0.432	0.599
CX3CR1	TLR4	9606.ENSP00000351059	9606.ENSP00000363089	0	0	0	0	0.176	0	0	0.619	0.672
CX3CR1	TREM2	9606.ENSP00000351059	9606.ENSP00000362205	0	0	0	0	0.136	0	0	0.742	0.767
CX3CR1	ITGAM	9606.ENSP00000351059	9606.ENSP00000496959	0	0	0	0	0.214	0	0	0.789	0.827
CXCR2	TGFB1	9606.ENSP00000319635	9606.ENSP00000221930	0	0	0	0	0.081	0.069	0	0.447	0.485
CXCR2	SELP	9606.ENSP00000319635	9606.ENSP00000263686	0	0	0	0	0.096	0	0	0.474	0.504
CXCR2	HAVCR2	9606.ENSP00000319635	9606.ENSP00000312002	0	0	0	0	0.07	0.091	0	0.376	0.426
CXCR2	NLRP3	9606.ENSP00000319635	9606.ENSP00000337383	0	0	0	0	0.113	0	0	0.353	0.401
CXCR2	VNN2	9606.ENSP00000319635	9606.ENSP00000322276	0	0	0	0	0.361	0	0	0.165	0.443
CXCR2	GPR183	9606.ENSP00000319635	9606.ENSP00000365596	0	0	0	0.697	0.128	0	0	0.403	0.457
CXCR2	SELE	9606.ENSP00000319635	9606.ENSP00000331736	0	0	0	0	0.074	0	0	0.474	0.492
CXCR2	PECAM1	9606.ENSP00000319635	9606.ENSP00000457421	0	0	0	0	0.168	0.091	0	0.453	0.55
CXCR2	MNDA	9606.ENSP00000319635	9606.ENSP00000357123	0	0	0	0	0.522	0	0	0.135	0.568
CXCR2	ITGB2	9606.ENSP00000319635	9606.ENSP00000380948	0	0	0	0	0.178	0	0	0.653	0.702
CXCR2	ITGAM	9606.ENSP00000319635	9606.ENSP00000496959	0	0	0	0	0.171	0	0	0.667	0.712
CXCR2	TLR4	9606.ENSP00000319635	9606.ENSP00000363089	0	0	0	0	0.192	0	0	0.771	0.807
CXCR2	GNG2	9606.ENSP00000319635	9606.ENSP00000334448	0	0	0	0	0.047	0.816	0	0.079	0.824
CXCR2	FPR1	9606.ENSP00000319635	9606.ENSP00000471493	0	0	0	0.748	0.392	0	0.5	0.505	0.836
CYTH4	IL10RA	9606.ENSP00000248901	9606.ENSP00000227752	0	0	0	0	0.48	0	0	0.107	0.516
CYTH4	LAPTM5	9606.ENSP00000248901	9606.ENSP00000294507	0	0	0	0	0.397	0	0	0.103	0.436
CYTH4	PLEKHO2	9606.ENSP00000248901	9606.ENSP00000326706	0	0	0	0	0.261	0	0	0.29	0.453
CYTH4	DOCK2	9606.ENSP00000248901	9606.ENSP00000429283	0	0	0	0	0.333	0	0	0.222	0.46
CYTH4	NCKAP1L	9606.ENSP00000248901	9606.ENSP00000293373	0	0	0	0	0.327	0	0	0.43	0.6
CYTH4	MYO1F	9606.ENSP00000248901	9606.ENSP00000494550	0	0	0	0	0.595	0	0	0.119	0.628
CYTH4	ITGB2	9606.ENSP00000248901	9606.ENSP00000380948	0	0	0	0	0.455	0	0	0.396	0.657
CYTH4	PIK3CG	9606.ENSP00000248901	9606.ENSP00000419260	0	0	0	0	0.201	0	0.65	0.073	0.718
DOCK10	DOCK11	9606.ENSP00000493664	9606.ENSP00000276202	0	0	0.061	0.943	0.181	0	0	0.311	0.424
DOCK10	S1PR1	9606.ENSP00000493664	9606.ENSP00000305416	0	0	0	0	0.144	0	0	0.417	0.479
DOCK10	DOCK2	9606.ENSP00000493664	9606.ENSP00000429283	0	0	0	0.547	0.198	0	0	0.4	0.498
DOCK11	DOCK2	9606.ENSP00000276202	9606.ENSP00000429283	0	0	0	0	0.178	0	0	0.641	0.693
DOCK2	NCKAP1L	9606.ENSP00000429283	9606.ENSP00000293373	0	0	0	0	0.477	0	0	0.512	0.734
DOCK2	LAPTM5	9606.ENSP00000429283	9606.ENSP00000294507	0	0	0	0	0.475	0	0	0.311	0.623
DOCK2	SLC9A9	9606.ENSP00000429283	9606.ENSP00000320246	0	0	0	0	0.13	0	0	0.354	0.414
DOCK2	WDFY4	9606.ENSP00000429283	9606.ENSP00000320563	0	0	0	0	0.417	0	0	0.145	0.48
DOCK2	FGR	9606.ENSP00000429283	9606.ENSP00000363117	0	0	0	0	0.213	0.045	0.9	0.253	0.936
DOCK2	ITGB2	9606.ENSP00000429283	9606.ENSP00000380948	0	0	0	0	0.497	0	0	0.367	0.668
DOCK2	DOCK8	9606.ENSP00000429283	9606.ENSP00000394888	0	0	0	0.547	0.253	0	0	0.408	0.539
DOCK2	PIK3CG	9606.ENSP00000429283	9606.ENSP00000419260	0	0	0	0	0.255	0	0	0.35	0.495
DOCK2	ITGAM	9606.ENSP00000429283	9606.ENSP00000496959	0	0	0	0	0.287	0	0	0.211	0.414
DOCK2	MYO1F	9606.ENSP00000429283	9606.ENSP00000494550	0	0	0	0	0.293	0	0	0.488	0.623
DOCK8	NCKAP1L	9606.ENSP00000394888	9606.ENSP00000293373	0	0	0	0	0.371	0.089	0	0.312	0.571
DOCK8	ITGB2	9606.ENSP00000394888	9606.ENSP00000380948	0	0	0	0	0.277	0	0	0.254	0.437
EGR2	RUNX1	9606.ENSP00000242480	9606.ENSP00000300305	0	0	0	0	0.049	0.067	0	0.447	0.466
EGR2	NR4A3	9606.ENSP00000242480	9606.ENSP00000482027	0	0	0	0	0.363	0.052	0	0.544	0.701
EPAS1	HMOX1	9606.ENSP00000263734	9606.ENSP00000216117	0	0	0	0	0.067	0	0	0.606	0.616
EPAS1	TGFB1	9606.ENSP00000263734	9606.ENSP00000221930	0	0	0	0	0.058	0	0	0.45	0.459
EPAS1	NR3C1	9606.ENSP00000263734	9606.ENSP00000231509	0	0	0	0	0.109	0.25	0.5	0.257	0.718
EPAS1	PECAM1	9606.ENSP00000263734	9606.ENSP00000457421	0	0	0	0	0.072	0	0	0.476	0.492
EPB41L3	EPS8	9606.ENSP00000343158	9606.ENSP00000494689	0	0	0	0	0.074	0	0.5	0	0.517
EPB41L3	ITGAM	9606.ENSP00000343158	9606.ENSP00000496959	0	0	0	0	0.525	0	0	0	0.525
EPS8	FGR	9606.ENSP00000494689	9606.ENSP00000363117	0	0	0	0	0	0.061	0	0.461	0.473
FGR	IL10RA	9606.ENSP00000363117	9606.ENSP00000227752	0	0	0	0	0.427	0	0	0.091	0.457
FGR	LILRA1	9606.ENSP00000363117	9606.ENSP00000251372	0	0	0	0	0.425	0.081	0	0	0.448
FGR	LAPTM5	9606.ENSP00000363117	9606.ENSP00000294507	0	0	0	0	0.392	0	0	0.142	0.456
FGR	GIMAP8	9606.ENSP00000363117	9606.ENSP00000305107	0	0	0	0	0.338	0.097	0	0.207	0.485
FGR	WDFY4	9606.ENSP00000363117	9606.ENSP00000320563	0	0	0	0	0.441	0.071	0	0.051	0.464
FGR	VNN2	9606.ENSP00000363117	9606.ENSP00000322276	0	0	0	0	0.393	0	0	0.082	0.419
FGR	TAGAP	9606.ENSP00000363117	9606.ENSP00000356033	0	0	0	0	0.404	0.045	0	0.116	0.453
FGR	MNDA	9606.ENSP00000363117	9606.ENSP00000357123	0	0	0	0	0.772	0	0	0.139	0.795
FGR	TLR4	9606.ENSP00000363117	9606.ENSP00000363089	0	0	0	0	0.263	0.1	0	0.225	0.441
FGR	SIGLEC9	9606.ENSP00000363117	9606.ENSP00000413861	0	0	0	0	0.34	0.102	0	0.093	0.415
FGR	TNFRSF1B	9606.ENSP00000363117	9606.ENSP00000365435	0	0	0	0	0.346	0	0	0.146	0.418
FGR	FPR1	9606.ENSP00000363117	9606.ENSP00000471493	0	0	0	0	0.401	0	0	0.191	0.495
FGR	MYO1F	9606.ENSP00000363117	9606.ENSP00000494550	0	0	0	0	0.499	0.045	0	0.093	0.528
FGR	ITGAM	9606.ENSP00000363117	9606.ENSP00000496959	0	0	0	0	0.52	0.058	0	0.261	0.636
FGR	ITGB2	9606.ENSP00000363117	9606.ENSP00000380948	0	0	0	0	0.492	0.071	0	0.341	0.662
FGR	PIK3CG	9606.ENSP00000363117	9606.ENSP00000419260	0	0	0	0	0.121	0.069	0.9	0.261	0.931
FGR	PIK3R5	9606.ENSP00000363117	9606.ENSP00000392812	0	0	0	0	0.335	0	0.9	0.191	0.941
FKBP5	NR3C1	9606.ENSP00000444810	9606.ENSP00000231509	0	0	0	0	0.055	0.376	0.5	0.998	0.999
FKBP5	SGK1	9606.ENSP00000444810	9606.ENSP00000356832	0	0	0	0	0.057	0.466	0	0.825	0.904
FLI1	RUNX1	9606.ENSP00000433488	9606.ENSP00000300305	0	0	0	0	0.078	0.236	0.8	0.505	0.921
FPR1	ITGAV	9606.ENSP00000471493	9606.ENSP00000261023	0	0	0	0	0.057	0	0	0.446	0.455
FPR1	VNN2	9606.ENSP00000471493	9606.ENSP00000322276	0	0	0	0	0.425	0	0	0.248	0.549
FPR1	GNG2	9606.ENSP00000471493	9606.ENSP00000334448	0	0	0	0	0.083	0.816	0	0.129	0.84
FPR1	NLRP3	9606.ENSP00000471493	9606.ENSP00000337383	0	0	0	0	0.252	0	0	0.288	0.444
FPR1	TLR1	9606.ENSP00000471493	9606.ENSP00000354932	0	0	0	0	0.285	0	0	0.201	0.404
FPR1	MNDA	9606.ENSP00000471493	9606.ENSP00000357123	0	0	0	0	0.492	0	0	0.507	0.739
FPR1	TREM2	9606.ENSP00000471493	9606.ENSP00000362205	0	0	0	0	0.083	0	0	0.598	0.615
FPR1	TLR4	9606.ENSP00000471493	9606.ENSP00000363089	0	0	0	0	0.37	0	0	0.643	0.765
FPR1	TNFRSF1B	9606.ENSP00000471493	9606.ENSP00000365435	0	0	0	0	0.227	0	0.4	0.201	0.597
FPR1	GPR183	9606.ENSP00000471493	9606.ENSP00000365596	0	0	0	0.658	0.219	0	0	0.293	0.424
FPR1	LILRA2	9606.ENSP00000471493	9606.ENSP00000375618	0	0	0	0	0.463	0.091	0	0.174	0.562
FPR1	ITGB2	9606.ENSP00000471493	9606.ENSP00000380948	0	0	0	0	0.316	0	0	0.372	0.552
FPR1	PIK3CG	9606.ENSP00000471493	9606.ENSP00000419260	0	0	0	0	0.109	0.225	0	0.249	0.436
FPR1	ITGAM	9606.ENSP00000471493	9606.ENSP00000496959	0	0	0	0	0.285	0	0	0.418	0.566
GAB3	PIK3CG	9606.ENSP00000399588	9606.ENSP00000419260	0	0	0	0	0.145	0	0.5	0	0.554
GALNT10	MAN2A1	9606.ENSP00000297107	9606.ENSP00000261483	0	0	0	0	0.072	0	0	0.381	0.401
GAPT	MNDA	9606.ENSP00000379997	9606.ENSP00000357123	0	0	0	0	0.4	0	0	0.133	0.457
GAPT	LAT2	9606.ENSP00000379997	9606.ENSP00000381492	0	0	0	0	0.211	0	0	0.401	0.507
GLIPR1	LAPTM5	9606.ENSP00000266659	9606.ENSP00000294507	0	0	0	0	0.271	0	0	0.52	0.635
GNG2	S1PR1	9606.ENSP00000334448	9606.ENSP00000305416	0	0	0	0	0.126	0.827	0	0	0.842
GNG2	P2RY12	9606.ENSP00000334448	9606.ENSP00000307259	0	0	0	0	0.068	0	0.5	0.106	0.547
GNG2	GPR183	9606.ENSP00000334448	9606.ENSP00000365596	0	0	0	0	0.072	0.8	0	0.066	0.811
GNG2	PIK3CG	9606.ENSP00000334448	9606.ENSP00000419260	0	0	0	0	0.074	0.225	0.65	0.466	0.847
GNG2	PIK3R5	9606.ENSP00000334448	9606.ENSP00000392812	0	0	0	0	0.068	0.225	0.65	0.76	0.931
GNG2	HTR7	9606.ENSP00000334448	9606.ENSP00000337949	0	0	0	0	0	0.831	0.9	0.076	0.983
GPR183	IL10RA	9606.ENSP00000365596	9606.ENSP00000227752	0	0	0	0	0.394	0	0	0.103	0.434
GPR183	S1PR1	9606.ENSP00000365596	9606.ENSP00000305416	0	0	0	0	0.268	0	0	0.481	0.604
GPR183	TAGAP	9606.ENSP00000365596	9606.ENSP00000356033	0	0	0	0	0.421	0	0	0.272	0.561
GPR183	ITGAM	9606.ENSP00000365596	9606.ENSP00000496959	0	0	0	0	0.244	0	0	0.245	0.405
GPR183	NEDD4	9606.ENSP00000365596	9606.ENSP00000424827	0	0	0	0	0	0	0	0.437	0.437
GPR183	PECAM1	9606.ENSP00000365596	9606.ENSP00000457421	0	0	0	0	0.225	0.208	0	0.168	0.445
GPR34	P2RY12	9606.ENSP00000367384	9606.ENSP00000307259	0	0	0	0.763	0.373	0	0	0.196	0.474
GPR34	TREM2	9606.ENSP00000367384	9606.ENSP00000362205	0	0	0	0	0.218	0	0	0.618	0.689
HAVCR2	TGFB1	9606.ENSP00000312002	9606.ENSP00000221930	0	0	0	0	0	0	0	0.66	0.66
HAVCR2	IL10RA	9606.ENSP00000312002	9606.ENSP00000227752	0	0	0	0	0.179	0	0	0.309	0.409
HAVCR2	ITGB2	9606.ENSP00000312002	9606.ENSP00000380948	0	0	0	0	0.208	0.071	0	0.259	0.407
HAVCR2	TLR4	9606.ENSP00000312002	9606.ENSP00000363089	0	0	0	0	0.085	0.097	0	0.449	0.505
HAVCR2	SIGLEC9	9606.ENSP00000312002	9606.ENSP00000413861	0	0	0.223	0	0.126	0.126	0	0.3	0.529
HAVCR2	JAK1	9606.ENSP00000312002	9606.ENSP00000499900	0	0	0	0	0.059	0.238	0	0.398	0.531
HAVCR2	STAB1	9606.ENSP00000312002	9606.ENSP00000312946	0	0	0	0	0.098	0	0	0.508	0.537
HAVCR2	ITGAM	9606.ENSP00000312002	9606.ENSP00000496959	0	0	0	0	0.142	0.067	0	0.59	0.643
HAVCR2	TLR7	9606.ENSP00000312002	9606.ENSP00000370034	0	0	0	0	0.127	0.097	0	0.595	0.653
HMOX1	MAP3K5	9606.ENSP00000216117	9606.ENSP00000351908	0	0	0	0	0	0	0	0.42	0.42
HMOX1	SELP	9606.ENSP00000216117	9606.ENSP00000263686	0	0	0	0	0	0	0	0.425	0.425
HMOX1	PECAM1	9606.ENSP00000216117	9606.ENSP00000457421	0	0	0	0	0.056	0	0	0.421	0.43
HMOX1	THBD	9606.ENSP00000216117	9606.ENSP00000366307	0	0	0	0	0.084	0	0	0.42	0.446
HMOX1	ITGAM	9606.ENSP00000216117	9606.ENSP00000496959	0	0	0	0	0.079	0	0	0.447	0.468
HMOX1	SELE	9606.ENSP00000216117	9606.ENSP00000331736	0	0	0	0	0	0	0	0.518	0.518
HMOX1	HPGDS	9606.ENSP00000216117	9606.ENSP00000295256	0	0	0	0	0	0	0	0.6	0.6
HMOX1	TGFB1	9606.ENSP00000216117	9606.ENSP00000221930	0	0	0	0	0.083	0	0	0.63	0.646
HMOX1	TLR4	9606.ENSP00000216117	9606.ENSP00000363089	0	0	0	0	0.074	0	0	0.709	0.719
HMOX1	NLRP3	9606.ENSP00000216117	9606.ENSP00000337383	0	0	0	0	0.056	0	0.75	0.582	0.892
HPGDS	TBXAS1	9606.ENSP00000295256	9606.ENSP00000389414	0	0	0	0	0.169	0	0	0.466	0.537
IL10RA	TGFB1	9606.ENSP00000227752	9606.ENSP00000221930	0	0	0	0	0.143	0	0	0.618	0.658
IL10RA	IL16	9606.ENSP00000227752	9606.ENSP00000302935	0	0	0	0	0.224	0	0	0.261	0.402
IL10RA	MYO1F	9606.ENSP00000227752	9606.ENSP00000494550	0	0	0	0	0.375	0	0	0.09	0.407
IL10RA	NCKAP1L	9606.ENSP00000227752	9606.ENSP00000293373	0	0	0	0	0.305	0	0	0.192	0.415
IL10RA	MNDA	9606.ENSP00000227752	9606.ENSP00000357123	0	0	0	0	0.363	0	0	0.12	0.416
IL10RA	S1PR1	9606.ENSP00000227752	9606.ENSP00000305416	0	0	0	0	0.169	0.218	0	0.174	0.416
IL10RA	TLR1	9606.ENSP00000227752	9606.ENSP00000354932	0	0	0	0	0.267	0	0	0.271	0.443
IL10RA	TAGAP	9606.ENSP00000227752	9606.ENSP00000356033	0	0	0	0	0.402	0	0	0.12	0.451
IL10RA	TLR7	9606.ENSP00000227752	9606.ENSP00000370034	0	0	0	0	0.241	0	0	0.358	0.492
IL10RA	TLR4	9606.ENSP00000227752	9606.ENSP00000363089	0	0	0	0	0.183	0	0	0.454	0.535
IL10RA	LAPTM5	9606.ENSP00000227752	9606.ENSP00000294507	0	0	0	0	0.444	0	0	0.301	0.595
IL10RA	ITGB2	9606.ENSP00000227752	9606.ENSP00000380948	0	0	0	0	0.443	0	0	0.31	0.599
IL10RA	ITGAM	9606.ENSP00000227752	9606.ENSP00000496959	0	0	0	0	0.379	0	0	0.47	0.656
IL10RA	TNFRSF1B	9606.ENSP00000227752	9606.ENSP00000365435	0	0	0	0	0.353	0	0	0.593	0.726
IL10RA	IL13RA1	9606.ENSP00000227752	9606.ENSP00000360730	0	0	0	0	0.049	0	0	0.724	0.726
IL10RA	JAK1	9606.ENSP00000227752	9606.ENSP00000499900	0	0	0	0	0.106	0.948	0.9	0.987	0.999
IL13RA1	TGFB1	9606.ENSP00000360730	9606.ENSP00000221930	0	0	0	0	0.077	0	0	0.557	0.573
IL13RA1	TLR4	9606.ENSP00000360730	9606.ENSP00000363089	0	0	0	0	0.174	0	0	0.315	0.41
IL13RA1	TNFRSF1B	9606.ENSP00000360730	9606.ENSP00000365435	0	0	0	0	0.095	0	0	0.476	0.506
IL13RA1	JAK1	9606.ENSP00000360730	9606.ENSP00000499900	0	0	0	0	0.088	0	0.65	0.925	0.973
IL16	TGFB1	9606.ENSP00000302935	9606.ENSP00000221930	0	0	0	0	0.119	0	0	0.359	0.411
IL16	ITGB2	9606.ENSP00000302935	9606.ENSP00000380948	0	0	0	0	0.298	0	0	0.183	0.402
IL16	TNFRSF1B	9606.ENSP00000302935	9606.ENSP00000365435	0	0	0	0	0.12	0	0	0.37	0.421
ITGA4	TGFB1	9606.ENSP00000380227	9606.ENSP00000221930	0	0	0	0	0.126	0	0	0.589	0.626
ITGA4	ITGAV	9606.ENSP00000380227	9606.ENSP00000261023	0	0	0.097	0.664	0.044	0.226	0.9	0.496	0.96
ITGA4	SELP	9606.ENSP00000380227	9606.ENSP00000263686	0	0	0	0	0.087	0	0	0.679	0.694
ITGA4	SELE	9606.ENSP00000380227	9606.ENSP00000331736	0	0	0	0	0.07	0	0	0.717	0.725
ITGA4	TLR4	9606.ENSP00000380227	9606.ENSP00000363089	0	0	0	0	0.134	0.05	0	0.375	0.441
ITGA4	PECAM1	9606.ENSP00000380227	9606.ENSP00000457421	0	0	0	0	0.103	0.067	0	0.721	0.746
ITGA4	ITGAM	9606.ENSP00000380227	9606.ENSP00000496959	0	0	0	0.607	0.123	0	0.54	0.538	0.797
ITGA4	ITGB2	9606.ENSP00000380227	9606.ENSP00000380948	0	0	0	0	0.156	0.135	0.9	0.928	0.994
ITGAM	TGFB1	9606.ENSP00000496959	9606.ENSP00000221930	0	0	0	0	0.142	0	0	0.65	0.687
ITGAM	ITGAV	9606.ENSP00000496959	9606.ENSP00000261023	0	0	0	0.581	0.047	0	0.54	0.24	0.638
ITGAM	SELP	9606.ENSP00000496959	9606.ENSP00000263686	0	0	0	0	0.149	0	0	0.926	0.934
ITGAM	LAPTM5	9606.ENSP00000496959	9606.ENSP00000294507	0	0	0	0	0.388	0	0	0.171	0.471
ITGAM	RUNX1	9606.ENSP00000496959	9606.ENSP00000300305	0	0	0	0	0.104	0	0	0.493	0.526
ITGAM	S1PR1	9606.ENSP00000496959	9606.ENSP00000305416	0	0	0	0	0.145	0	0	0.359	0.428
ITGAM	P2RY12	9606.ENSP00000496959	9606.ENSP00000307259	0	0	0	0	0.118	0	0	0.643	0.672
ITGAM	OLR1	9606.ENSP00000496959	9606.ENSP00000309124	0	0	0	0	0.095	0	0	0.427	0.459
ITGAM	STAB1	9606.ENSP00000496959	9606.ENSP00000312946	0	0	0	0	0.214	0	0	0.315	0.439
ITGAM	WDFY4	9606.ENSP00000496959	9606.ENSP00000320563	0	0	0	0	0.379	0	0	0.208	0.487
ITGAM	SELE	9606.ENSP00000496959	9606.ENSP00000331736	0	0	0	0	0.07	0	0	0.755	0.762
ITGAM	NLRP3	9606.ENSP00000496959	9606.ENSP00000337383	0	0	0	0	0.222	0.05	0	0.48	0.582
ITGAM	TLR1	9606.ENSP00000496959	9606.ENSP00000354932	0	0	0	0	0.276	0.05	0	0.664	0.748
ITGAM	MNDA	9606.ENSP00000496959	9606.ENSP00000357123	0	0	0	0	0.482	0	0	0.145	0.538
ITGAM	TREM2	9606.ENSP00000496959	9606.ENSP00000362205	0	0	0	0	0.152	0	0	0.581	0.629
ITGAM	TLR4	9606.ENSP00000496959	9606.ENSP00000363089	0	0	0	0	0.252	0.05	0	0.897	0.92
ITGAM	TNFRSF1B	9606.ENSP00000496959	9606.ENSP00000365435	0	0	0	0	0.227	0	0	0.349	0.475
ITGAM	THBD	9606.ENSP00000496959	9606.ENSP00000366307	0	0	0	0	0.095	0.045	0	0.58	0.605
ITGAM	TLR7	9606.ENSP00000496959	9606.ENSP00000370034	0	0	0	0	0.176	0.05	0	0.774	0.807
ITGAM	ITGB2	9606.ENSP00000496959	9606.ENSP00000380948	0	0	0	0	0.55	0.931	0.9	0.999	0.999
ITGAM	TLR6	9606.ENSP00000496959	9606.ENSP00000389600	0	0	0	0	0.113	0.05	0	0.374	0.426
ITGAM	PIK3R5	9606.ENSP00000496959	9606.ENSP00000392812	0	0	0	0	0.367	0	0	0.125	0.422
ITGAM	SIGLEC9	9606.ENSP00000496959	9606.ENSP00000413861	0	0	0	0	0.344	0.071	0	0.258	0.509
ITGAM	PIK3CG	9606.ENSP00000496959	9606.ENSP00000419260	0	0	0	0	0.145	0	0	0.332	0.405
ITGAM	PECAM1	9606.ENSP00000496959	9606.ENSP00000457421	0	0	0	0	0.258	0.067	0	0.782	0.836
ITGAM	MYO1F	9606.ENSP00000496959	9606.ENSP00000494550	0	0	0	0	0.445	0	0	0.104	0.482
ITGAM	JAK1	9606.ENSP00000496959	9606.ENSP00000499900	0	0	0	0	0.082	0.058	0	0.377	0.415
ITGAV	TGFB1	9606.ENSP00000261023	9606.ENSP00000221930	0	0	0	0	0.076	0.961	0.5	0.748	0.994
ITGAV	TLR6	9606.ENSP00000261023	9606.ENSP00000389600	0	0	0	0	0.055	0.05	0	0.409	0.423
ITGAV	SELE	9606.ENSP00000261023	9606.ENSP00000331736	0	0	0	0	0.044	0	0	0.595	0.596
ITGAV	SELP	9606.ENSP00000261023	9606.ENSP00000263686	0	0	0	0	0	0	0	0.617	0.617
ITGAV	PECAM1	9606.ENSP00000261023	9606.ENSP00000457421	0	0	0	0	0.069	0.067	0.5	0.77	0.886
ITGAV	ITGB2	9606.ENSP00000261023	9606.ENSP00000380948	0	0	0	0	0.098	0.135	0.9	0.89	0.99
ITGB2	TGFB1	9606.ENSP00000380948	9606.ENSP00000221930	0	0	0	0	0.255	0	0	0.61	0.697
ITGB2	SELP	9606.ENSP00000380948	9606.ENSP00000263686	0	0	0	0	0.164	0	0	0.975	0.978
ITGB2	NCKAP1L	9606.ENSP00000380948	9606.ENSP00000293373	0	0	0	0	0.404	0	0	0.195	0.5
ITGB2	LAPTM5	9606.ENSP00000380948	9606.ENSP00000294507	0	0	0	0	0.789	0.126	0	0.311	0.861
ITGB2	WDFY4	9606.ENSP00000380948	9606.ENSP00000320563	0	0	0	0	0.394	0	0	0.124	0.447
ITGB2	VNN2	9606.ENSP00000380948	9606.ENSP00000322276	0	0	0	0	0.267	0.292	0	0.223	0.561
ITGB2	SELE	9606.ENSP00000380948	9606.ENSP00000331736	0	0	0	0	0.105	0	0	0.993	0.993
ITGB2	TLR1	9606.ENSP00000380948	9606.ENSP00000354932	0	0	0	0	0.354	0.057	0	0.789	0.86
ITGB2	TAGAP	9606.ENSP00000380948	9606.ENSP00000356033	0	0	0	0	0.404	0	0	0.102	0.443
ITGB2	MNDA	9606.ENSP00000380948	9606.ENSP00000357123	0	0	0	0	0.442	0	0	0.095	0.473
ITGB2	TREM2	9606.ENSP00000380948	9606.ENSP00000362205	0	0	0	0	0.2	0	0	0.304	0.42
ITGB2	TLR4	9606.ENSP00000380948	9606.ENSP00000363089	0	0	0	0	0.251	0.057	0	0.572	0.672
ITGB2	TNFRSF1B	9606.ENSP00000380948	9606.ENSP00000365435	0	0	0	0	0.35	0	0	0.277	0.51
ITGB2	THBD	9606.ENSP00000380948	9606.ENSP00000366307	0	0	0	0	0.09	0.067	0	0.54	0.575
ITGB2	TLR7	9606.ENSP00000380948	9606.ENSP00000370034	0	0	0	0	0.257	0.057	0	0.553	0.66
ITGB2	LSP1	9606.ENSP00000380948	9606.ENSP00000371194	0	0	0	0	0.383	0	0	0.246	0.515
ITGB2	LILRA2	9606.ENSP00000380948	9606.ENSP00000375618	0	0	0	0	0.34	0.071	0	0.106	0.404
ITGB2	SIGLEC9	9606.ENSP00000380948	9606.ENSP00000413861	0	0	0	0	0.256	0	0	0.229	0.402
ITGB2	PIK3R5	9606.ENSP00000380948	9606.ENSP00000392812	0	0	0	0	0.342	0	0	0.141	0.411
ITGB2	TGFBI	9606.ENSP00000380948	9606.ENSP00000416330	0	0	0	0	0.189	0.292	0	0.238	0.524
ITGB2	MYO1F	9606.ENSP00000380948	9606.ENSP00000494550	0	0	0	0	0.489	0	0	0.258	0.605
ITGB2	PECAM1	9606.ENSP00000380948	9606.ENSP00000457421	0	0	0	0	0.259	0.071	0	0.751	0.814
JAK1	TGFB1	9606.ENSP00000499900	9606.ENSP00000221930	0	0	0	0	0.082	0.126	0	0.439	0.511
JAK1	RUNX1	9606.ENSP00000499900	9606.ENSP00000300305	0	0	0	0	0.062	0	0	0.439	0.452
JAK1	NLRP3	9606.ENSP00000499900	9606.ENSP00000337383	0	0	0	0	0.063	0.1	0	0.365	0.417
JAK1	SH2B3	9606.ENSP00000499900	9606.ENSP00000345492	0	0	0	0	0.08	0.088	0	0.448	0.496
JAK1	TLR4	9606.ENSP00000499900	9606.ENSP00000363089	0	0	0	0	0.126	0.1	0	0.621	0.676
JAK1	TLR7	9606.ENSP00000499900	9606.ENSP00000370034	0	0	0	0	0.086	0.1	0	0.644	0.681
KLF2	TGFB1	9606.ENSP00000248071	9606.ENSP00000221930	0	0	0	0	0.141	0.045	0	0.357	0.426
KLF2	RUNX1	9606.ENSP00000248071	9606.ENSP00000300305	0	0	0	0	0.102	0.067	0	0.356	0.414
KLF2	TLR4	9606.ENSP00000248071	9606.ENSP00000363089	0	0	0	0	0.168	0.091	0	0.309	0.432
KLF2	SELE	9606.ENSP00000248071	9606.ENSP00000331736	0	0	0	0	0.078	0.057	0	0.479	0.508
KLF2	PECAM1	9606.ENSP00000248071	9606.ENSP00000457421	0	0	0	0	0.208	0	0	0.447	0.543
KLF2	THBD	9606.ENSP00000248071	9606.ENSP00000366307	0	0	0	0	0.131	0.095	0	0.554	0.619
KLF2	S1PR1	9606.ENSP00000248071	9606.ENSP00000305416	0	0	0	0	0.225	0	0	0.822	0.856
LAPTM5	NCKAP1L	9606.ENSP00000294507	9606.ENSP00000293373	0	0	0	0	0.761	0	0	0.474	0.868
LAPTM5	TBXAS1	9606.ENSP00000294507	9606.ENSP00000389414	0	0	0	0	0.269	0	0	0.218	0.405
LAPTM5	RAB31	9606.ENSP00000294507	9606.ENSP00000461945	0	0	0	0	0.128	0	0	0.401	0.455
LAPTM5	MNDA	9606.ENSP00000294507	9606.ENSP00000357123	0	0	0	0	0.391	0	0	0.19	0.485
LAPTM5	WDFY4	9606.ENSP00000294507	9606.ENSP00000320563	0	0	0	0	0.434	0	0	0.43	0.664
LAPTM5	MYO1F	9606.ENSP00000294507	9606.ENSP00000494550	0	0	0	0	0.581	0	0	0.277	0.684
LAPTM5	NEDD4	9606.ENSP00000294507	9606.ENSP00000424827	0	0	0	0	0	0.558	0	0.584	0.808
LILRA1	SIGLEC9	9606.ENSP00000251372	9606.ENSP00000413861	0	0	0	0	0.448	0.126	0	0.042	0.497
LILRA1	MNDA	9606.ENSP00000251372	9606.ENSP00000357123	0	0	0	0	0.787	0	0	0	0.787
LILRA2	MNDA	9606.ENSP00000375618	9606.ENSP00000357123	0	0	0	0	0.343	0	0	0.213	0.461
LILRA2	NLRP12	9606.ENSP00000375618	9606.ENSP00000375653	0	0	0	0	0.346	0	0	0.123	0.402
LILRA2	TLR6	9606.ENSP00000375618	9606.ENSP00000389600	0	0	0	0	0.094	0.097	0	0.356	0.427
LSP1	TMOD2	9606.ENSP00000371194	9606.ENSP00000249700	0	0	0	0	0	0.599	0	0.041	0.599
LSP1	MYO1F	9606.ENSP00000371194	9606.ENSP00000494550	0	0	0	0	0.317	0	0	0.173	0.412
MAN1A1	MAN2A1	9606.ENSP00000357453	9606.ENSP00000261483	0	0	0	0	0.099	0	0.5	0.94	0.97
MAP3K5	TLR4	9606.ENSP00000351908	9606.ENSP00000363089	0	0	0	0	0.143	0	0	0.465	0.522
MEF2C	RUNX1	9606.ENSP00000340874	9606.ENSP00000300305	0	0	0	0	0	0	0	0.44	0.44
MEF2C	TREM2	9606.ENSP00000340874	9606.ENSP00000362205	0	0	0	0	0.067	0	0	0.411	0.426
MEF2C	PECAM1	9606.ENSP00000340874	9606.ENSP00000457421	0	0	0	0	0.122	0	0	0.41	0.459
MEF2C	ZEB2	9606.ENSP00000340874	9606.ENSP00000487174	0	0	0	0	0.159	0.071	0	0.377	0.471
MNDA	MS4A7	9606.ENSP00000357123	9606.ENSP00000300184	0	0	0	0	0.337	0	0	0.196	0.444
MNDA	WDFY4	9606.ENSP00000357123	9606.ENSP00000320563	0	0	0	0	0.431	0	0	0	0.431
MNDA	VNN2	9606.ENSP00000357123	9606.ENSP00000322276	0	0	0	0	0.497	0	0	0.201	0.58
MNDA	TLR1	9606.ENSP00000357123	9606.ENSP00000354932	0	0	0	0	0.397	0	0	0.092	0.43
MNDA	TAGAP	9606.ENSP00000357123	9606.ENSP00000356033	0	0	0	0	0.444	0	0	0.114	0.486
MNDA	SIGLEC9	9606.ENSP00000357123	9606.ENSP00000413861	0	0	0	0	0.422	0	0	0	0.422
MNDA	TLR4	9606.ENSP00000357123	9606.ENSP00000363089	0	0	0	0	0.346	0	0	0.153	0.423
MNDA	NLRP12	9606.ENSP00000357123	9606.ENSP00000375653	0	0	0	0	0.187	0	0	0.325	0.428
MNDA	MYO1F	9606.ENSP00000357123	9606.ENSP00000494550	0	0	0	0	0.453	0	0	0	0.453
MRPL2	RPS21	9606.ENSP00000373404	9606.ENSP00000345957	0	0	0	0	0.623	0.786	0	0.166	0.926
MRPL2	RPS27	9606.ENSP00000373404	9606.ENSP00000499044	0	0	0	0	0.369	0.579	0	0.178	0.762
MRPL2	RPS20	9606.ENSP00000373404	9606.ENSP00000429374	0.102	0	0	0	0.663	0.578	0	0.249	0.891
MRPL2	RPL28	9606.ENSP00000373404	9606.ENSP00000452763	0	0	0	0	0.598	0.784	0	0.161	0.92
MRPL2	RPL36	9606.ENSP00000373404	9606.ENSP00000464342	0	0	0	0	0.621	0.782	0	0.205	0.928
MRPL2	RPL35A	9606.ENSP00000373404	9606.ENSP00000495672	0	0	0	0	0.695	0.785	0	0.13	0.938
MRPL2	RPL37A	9606.ENSP00000373404	9606.ENSP00000418082	0	0	0	0	0.747	0.782	0	0.31	0.958
MYO1E	MYO5A	9606.ENSP00000288235	9606.ENSP00000382177	0	0	0	0.766	0.044	0.274	0	0.204	0.4
MYO1F	NCKAP1L	9606.ENSP00000494550	9606.ENSP00000293373	0	0	0	0	0.422	0	0	0.263	0.556
MYO1F	WDFY4	9606.ENSP00000494550	9606.ENSP00000320563	0	0	0	0	0.38	0.098	0	0	0.417
MYO1F	PLEKHO2	9606.ENSP00000494550	9606.ENSP00000326706	0	0	0	0	0.331	0	0	0.157	0.411
MYO1F	TAGAP	9606.ENSP00000494550	9606.ENSP00000356033	0	0	0	0	0.321	0	0	0.237	0.46
MYO1F	NLRP12	9606.ENSP00000494550	9606.ENSP00000375653	0	0	0	0	0.306	0.23	0	0.067	0.457
MYO1F	TBXAS1	9606.ENSP00000494550	9606.ENSP00000389414	0	0	0	0	0.389	0	0	0.078	0.413
MYO1F	RASGRP4	9606.ENSP00000494550	9606.ENSP00000479844	0	0	0	0	0.348	0	0	0.159	0.428
MYO5A	TMOD3	9606.ENSP00000382177	9606.ENSP00000308753	0	0	0	0	0.087	0.202	0	0.289	0.437
MYO5A	SYTL4	9606.ENSP00000382177	9606.ENSP00000362080	0	0	0	0	0	0	0	0.735	0.735
NCKAP1L	PLD4	9606.ENSP00000293373	9606.ENSP00000438677	0	0	0	0	0.334	0	0	0.212	0.453
NCKAP1L	PIK3CG	9606.ENSP00000293373	9606.ENSP00000419260	0	0	0	0	0.367	0	0	0.217	0.483
NEDD4	SGK1	9606.ENSP00000424827	9606.ENSP00000356832	0	0	0	0	0.048	0.644	0	0.64	0.867
NLRP12	NLRP3	9606.ENSP00000375653	9606.ENSP00000337383	0	0	0.054	0.925	0.08	0	0	0.983	0.984
NLRP12	TLR4	9606.ENSP00000375653	9606.ENSP00000363089	0	0	0	0	0.173	0	0	0.436	0.514
NLRP12	RASGRP4	9606.ENSP00000375653	9606.ENSP00000479844	0	0	0	0	0.417	0	0	0	0.416
NLRP3	TGFB1	9606.ENSP00000337383	9606.ENSP00000221930	0	0	0	0	0.044	0	0	0.471	0.472
NLRP3	TREM2	9606.ENSP00000337383	9606.ENSP00000362205	0	0	0	0	0.089	0	0	0.373	0.404
NLRP3	TLR6	9606.ENSP00000337383	9606.ENSP00000389600	0	0	0	0	0.084	0	0	0.479	0.502
NLRP3	TNFRSF1B	9606.ENSP00000337383	9606.ENSP00000365435	0	0	0	0	0.148	0	0	0.456	0.517
NLRP3	TLR1	9606.ENSP00000337383	9606.ENSP00000354932	0	0	0	0	0.162	0	0	0.507	0.569
NLRP3	TLR7	9606.ENSP00000337383	9606.ENSP00000370034	0	0	0	0	0.102	0	0	0.608	0.632
NLRP3	TLR4	9606.ENSP00000337383	9606.ENSP00000363089	0	0	0	0	0.203	0	0	0.849	0.874
NME1	RP2	9606.ENSP00000337060	9606.ENSP00000218340	0	0	0	0	0.042	0	0	0.583	0.583
NME1	RPL36	9606.ENSP00000337060	9606.ENSP00000464342	0	0	0	0	0.372	0	0	0.1	0.411
NME1	RPS20	9606.ENSP00000337060	9606.ENSP00000429374	0	0	0	0	0.461	0.282	0	0.102	0.622
NR3C1	TLR4	9606.ENSP00000231509	9606.ENSP00000363089	0	0	0	0	0.127	0.066	0	0.406	0.474
NR3C1	RUNX1	9606.ENSP00000231509	9606.ENSP00000300305	0	0	0	0	0.097	0.071	0	0.51	0.553
NR3C1	SGK1	9606.ENSP00000231509	9606.ENSP00000356832	0	0	0	0	0.073	0.053	0	0.623	0.64
NR4A3	RUNX1	9606.ENSP00000482027	9606.ENSP00000300305	0	0	0	0	0.061	0	0.75	0.203	0.796
OLR1	SELP	9606.ENSP00000309124	9606.ENSP00000263686	0	0	0	0	0.087	0	0	0.452	0.478
OLR1	TREM2	9606.ENSP00000309124	9606.ENSP00000362205	0	0	0	0	0.098	0	0	0.405	0.44
OLR1	SELE	9606.ENSP00000309124	9606.ENSP00000331736	0	0	0	0	0.067	0	0	0.505	0.519
OLR1	TLR4	9606.ENSP00000309124	9606.ENSP00000363089	0	0	0	0	0.087	0.045	0	0.584	0.606
OLR1	TMEM52B	9606.ENSP00000309124	9606.ENSP00000371348	0	0	0	0	0.538	0	0	0.2	0.614
OLR1	STAB1	9606.ENSP00000309124	9606.ENSP00000312946	0	0	0	0	0.049	0	0	0.646	0.649
P2RY12	SELP	9606.ENSP00000307259	9606.ENSP00000263686	0	0	0	0	0.086	0	0	0.819	0.827
P2RY12	STAB1	9606.ENSP00000307259	9606.ENSP00000312946	0	0	0	0	0.086	0	0	0.385	0.414
P2RY12	TLR4	9606.ENSP00000307259	9606.ENSP00000363089	0	0	0	0	0.105	0	0	0.385	0.426
P2RY12	TREM2	9606.ENSP00000307259	9606.ENSP00000362205	0	0	0	0	0.099	0	0	0.866	0.874
PECAM1	TGFB1	9606.ENSP00000457421	9606.ENSP00000221930	0	0	0	0	0.11	0	0	0.679	0.702
PECAM1	SELP	9606.ENSP00000457421	9606.ENSP00000263686	0	0	0	0	0.192	0.091	0.4	0.816	0.908
PECAM1	RUNX1	9606.ENSP00000457421	9606.ENSP00000300305	0	0	0	0	0.104	0	0	0.419	0.457
PECAM1	S1PR1	9606.ENSP00000457421	9606.ENSP00000305416	0	0	0	0	0.235	0.091	0	0.36	0.516
PECAM1	STAB1	9606.ENSP00000457421	9606.ENSP00000312946	0	0	0	0	0.221	0	0	0.367	0.486
PECAM1	SELE	9606.ENSP00000457421	9606.ENSP00000331736	0	0	0	0	0.098	0.091	0	0.954	0.959
PECAM1	PTGFR	9606.ENSP00000457421	9606.ENSP00000359793	0	0	0	0	0	0.091	0	0.524	0.548
PECAM1	SYTL4	9606.ENSP00000457421	9606.ENSP00000362080	0	0	0	0	0.069	0	0.4	0	0.417
PECAM1	TLR4	9606.ENSP00000457421	9606.ENSP00000363089	0	0	0	0	0.225	0.097	0	0.485	0.608
PECAM1	THBD	9606.ENSP00000457421	9606.ENSP00000366307	0	0	0	0	0.139	0.107	0	0.512	0.592
PECAM1	PIK3CG	9606.ENSP00000457421	9606.ENSP00000419260	0	0	0	0	0.111	0.292	0	0.196	0.449
PFDN2	RPL35A	9606.ENSP00000356989	9606.ENSP00000495672	0	0	0	0	0.451	0	0	0	0.451
PFDN2	RPL28	9606.ENSP00000356989	9606.ENSP00000452763	0	0	0	0	0.411	0	0	0.108	0.452
PFDN2	RPS20	9606.ENSP00000356989	9606.ENSP00000429374	0	0	0	0	0.533	0	0	0	0.533
PIK3CG	TLR1	9606.ENSP00000419260	9606.ENSP00000354932	0	0	0	0	0.328	0.079	0	0.129	0.414
PIK3CG	TLR4	9606.ENSP00000419260	9606.ENSP00000363089	0	0	0	0	0.137	0.079	0	0.354	0.442
PIK3CG	PIK3R5	9606.ENSP00000419260	9606.ENSP00000392812	0	0	0	0	0.18	0.969	0.9	0.998	0.999
RAB31	TBC1D2B	9606.ENSP00000461945	9606.ENSP00000300584	0	0	0	0	0.044	0.098	0	0.737	0.753
RASGRP3	WDFY4	9606.ENSP00000385886	9606.ENSP00000320563	0	0	0	0	0.121	0	0	0.348	0.402
RPL28	RPS21	9606.ENSP00000452763	9606.ENSP00000345957	0	0	0	0	0.99	0.991	0	0.505	0.999
RPL28	RPL37A	9606.ENSP00000452763	9606.ENSP00000418082	0	0	0	0	0.959	0.991	0	0.447	0.999
RPL28	RPS20	9606.ENSP00000452763	9606.ENSP00000429374	0	0	0	0	0.98	0.991	0	0.744	0.999
RPL28	RPS27	9606.ENSP00000452763	9606.ENSP00000499044	0	0	0	0	0.92	0.967	0	0.34	0.998
RPL28	RPL35A	9606.ENSP00000452763	9606.ENSP00000495672	0	0	0	0	0.978	0.991	0	0.452	0.999
RPL28	RPL36	9606.ENSP00000452763	9606.ENSP00000464342	0	0	0	0	0.99	0.994	0	0.688	0.999
RPL35A	SNRPD2	9606.ENSP00000495672	9606.ENSP00000342374	0	0	0	0	0.48	0	0	0	0.48
RPL35A	RPS21	9606.ENSP00000495672	9606.ENSP00000345957	0	0	0	0	0.991	0.991	0	0.34	0.999
RPL35A	RPL37A	9606.ENSP00000495672	9606.ENSP00000418082	0	0	0	0	0.992	0.991	0	0.817	0.999
RPL35A	RPS20	9606.ENSP00000495672	9606.ENSP00000429374	0	0	0	0	0.999	0.993	0	0.666	0.999
RPL35A	RPL36	9606.ENSP00000495672	9606.ENSP00000464342	0	0	0	0	0.991	0.993	0	0.707	0.999
RPL35A	RPS27	9606.ENSP00000495672	9606.ENSP00000499044	0	0	0	0	0.963	0.979	0	0.711	0.999
RPL36	SNRPD2	9606.ENSP00000464342	9606.ENSP00000342374	0	0	0	0	0.69	0	0	0	0.69
RPL36	RPS21	9606.ENSP00000464342	9606.ENSP00000345957	0	0	0	0	0.991	0.991	0.9	0.625	0.999
RPL36	RPL37A	9606.ENSP00000464342	9606.ENSP00000418082	0	0	0	0	0.99	0.995	0	0.649	0.999
RPL36	RPS20	9606.ENSP00000464342	9606.ENSP00000429374	0	0	0	0	0.981	0.993	0	0.592	0.999
RPL36	RPS27	9606.ENSP00000464342	9606.ENSP00000499044	0	0	0	0	0.96	0.967	0	0.608	0.999
RPL37A	RPS21	9606.ENSP00000418082	9606.ENSP00000345957	0	0	0	0	0.978	0.992	0	0.554	0.999
RPL37A	RPS20	9606.ENSP00000418082	9606.ENSP00000429374	0	0	0	0	0.991	0.994	0	0.541	0.999
RPL37A	RPS27	9606.ENSP00000418082	9606.ENSP00000499044	0	0	0	0	0.956	0.967	0	0.362	0.999
RPS20	SNRPD2	9606.ENSP00000429374	9606.ENSP00000342374	0	0	0	0	0.487	0	0	0	0.487
RPS20	RPS21	9606.ENSP00000429374	9606.ENSP00000345957	0	0	0	0	0.991	0.992	0.9	0.564	0.999
RPS20	RPS27	9606.ENSP00000429374	9606.ENSP00000499044	0	0	0	0	0.963	0.981	0.9	0.684	0.999
RPS21	SNRPD2	9606.ENSP00000345957	9606.ENSP00000342374	0	0	0	0	0.503	0	0	0.147	0.558
RPS21	RPS27	9606.ENSP00000345957	9606.ENSP00000499044	0	0	0	0	0.96	0.983	0.9	0.601	0.999
RPS27	TGFB1	9606.ENSP00000499044	9606.ENSP00000221930	0	0	0	0	0.042	0.13	0	0.407	0.462
RUNX1	TGFB1	9606.ENSP00000300305	9606.ENSP00000221930	0	0	0	0	0.129	0	0	0.4	0.455
RUNX1	SH2B3	9606.ENSP00000300305	9606.ENSP00000345492	0	0	0	0	0.06	0	0	0.594	0.602
S1PR1	STAB1	9606.ENSP00000305416	9606.ENSP00000312946	0	0	0	0	0.117	0	0	0.403	0.45
S1PR1	TNFRSF1B	9606.ENSP00000305416	9606.ENSP00000365435	0	0	0	0	0.127	0	0.4	0.118	0.498
SELE	TGFB1	9606.ENSP00000331736	9606.ENSP00000221930	0	0	0	0	0.074	0	0	0.509	0.526
SELE	SELP	9606.ENSP00000331736	9606.ENSP00000263686	0	0	0.08	0.911	0.21	0	0	0.921	0.937
SELE	TLR7	9606.ENSP00000331736	9606.ENSP00000370034	0	0	0	0	0.114	0.045	0	0.376	0.427
SELE	TNFRSF1B	9606.ENSP00000331736	9606.ENSP00000365435	0	0	0	0	0.092	0	0	0.599	0.62
SELE	TLR4	9606.ENSP00000331736	9606.ENSP00000363089	0	0	0	0	0.122	0.045	0	0.611	0.646
SELE	THBD	9606.ENSP00000331736	9606.ENSP00000366307	0	0	0	0	0.081	0.101	0	0.704	0.734
SELP	TGFB1	9606.ENSP00000263686	9606.ENSP00000221930	0	0	0	0	0.081	0	0	0.642	0.657
SELP	SPPL2A	9606.ENSP00000263686	9606.ENSP00000261854	0	0	0	0	0	0	0	0.41	0.41
SELP	SVEP1	9606.ENSP00000263686	9606.ENSP00000363593	0	0	0	0.649	0.061	0.101	0	0.359	0.411
SELP	TLR7	9606.ENSP00000263686	9606.ENSP00000370034	0	0	0	0	0.127	0.045	0	0.402	0.458
SELP	SYTL4	9606.ENSP00000263686	9606.ENSP00000362080	0	0	0	0	0.104	0	0.4	0.087	0.466
SELP	TNFRSF1B	9606.ENSP00000263686	9606.ENSP00000365435	0	0	0	0	0.117	0	0	0.495	0.535
SELP	THBD	9606.ENSP00000263686	9606.ENSP00000366307	0	0	0	0	0.085	0.101	0	0.712	0.743
SELP	TLR4	9606.ENSP00000263686	9606.ENSP00000363089	0	0	0	0	0.164	0.045	0	0.868	0.885
SH2B3	TAGAP	9606.ENSP00000345492	9606.ENSP00000356033	0	0	0	0	0.109	0	0	0.798	0.812
SIGLEC9	TLR1	9606.ENSP00000413861	9606.ENSP00000354932	0	0	0	0	0.214	0.279	0	0.097	0.444
SIGLEC9	TLR4	9606.ENSP00000413861	9606.ENSP00000363089	0	0	0	0	0.327	0.279	0	0.274	0.617
SLC22A3	SLCO2B1	9606.ENSP00000275300	9606.ENSP00000289575	0	0	0	0	0.068	0	0	0.538	0.552
SLCO2B1	STAB1	9606.ENSP00000289575	9606.ENSP00000312946	0	0	0	0	0.287	0	0	0.216	0.417
SLCO2B1	TREM2	9606.ENSP00000289575	9606.ENSP00000362205	0	0	0	0	0.354	0	0	0.186	0.452
SNRPD2	TLR4	9606.ENSP00000342374	9606.ENSP00000363089	0	0	0	0	0	0.234	0	0.333	0.467
STAB1	TREM2	9606.ENSP00000312946	9606.ENSP00000362205	0	0	0	0	0.197	0	0	0.355	0.46
STAB1	TBXAS1	9606.ENSP00000312946	9606.ENSP00000389414	0	0	0	0	0.151	0	0	0.418	0.485
TAGAP	WDFY4	9606.ENSP00000356033	9606.ENSP00000320563	0	0	0	0	0.434	0	0	0.091	0.464
TAGAP	TLR1	9606.ENSP00000356033	9606.ENSP00000354932	0	0	0	0	0.361	0	0	0.16	0.44
TGFB1	TLR7	9606.ENSP00000221930	9606.ENSP00000370034	0	0	0	0	0.086	0.045	0	0.378	0.409
TGFB1	TLR1	9606.ENSP00000221930	9606.ENSP00000354932	0	0	0	0	0.129	0.045	0	0.378	0.438
TGFB1	ZEB2	9606.ENSP00000221930	9606.ENSP00000487174	0	0	0	0	0.044	0	0	0.601	0.602
TGFB1	TGFBI	9606.ENSP00000221930	9606.ENSP00000416330	0	0	0	0	0.141	0	0	0.583	0.626
TGFB1	TNFRSF1B	9606.ENSP00000221930	9606.ENSP00000365435	0	0	0	0	0.135	0	0	0.613	0.651
TGFB1	TLR4	9606.ENSP00000221930	9606.ENSP00000363089	0	0	0	0	0.073	0.045	0	0.71	0.721
THBD	TLR4	9606.ENSP00000366307	9606.ENSP00000363089	0	0	0	0	0.19	0.125	0	0.661	0.739
THBD	TLR7	9606.ENSP00000366307	9606.ENSP00000370034	0	0	0	0	0.048	0.125	0	0.506	0.552
TLR1	TLR7	9606.ENSP00000354932	9606.ENSP00000370034	0	0	0	0.576	0.244	0.058	0	0.716	0.78
TLR1	TLR4	9606.ENSP00000354932	9606.ENSP00000363089	0	0	0	0.588	0.37	0.292	0.5	0.985	0.996
TLR1	TLR6	9606.ENSP00000354932	9606.ENSP00000389600	0	0	0.054	0.972	0.306	0.586	0.9	0.982	0.999
TLR4	WDFY4	9606.ENSP00000363089	9606.ENSP00000320563	0	0	0	0	0.246	0.065	0	0.422	0.557
TLR4	TREM2	9606.ENSP00000363089	9606.ENSP00000362205	0	0	0	0	0.155	0	0	0.73	0.762
TLR4	TNFRSF1B	9606.ENSP00000363089	9606.ENSP00000365435	0	0	0	0	0.182	0	0	0.642	0.694
TLR4	TLR7	9606.ENSP00000363089	9606.ENSP00000370034	0	0	0	0.58	0.19	0	0	0.929	0.94
TLR4	TLR6	9606.ENSP00000363089	9606.ENSP00000389600	0	0	0	0.59	0.19	0.292	0.9	0.989	0.999
TLR6	TLR7	9606.ENSP00000389600	9606.ENSP00000370034	0	0	0	0.574	0.119	0.058	0	0.61	0.648
TMOD2	TMOD3	9606.ENSP00000249700	9606.ENSP00000308753	0	0	0.052	0.977	0.043	0	0.5	0.061	0.517
TMOD2	TPM1	9606.ENSP00000249700	9606.ENSP00000351022	0	0	0	0	0.079	0.07	0.5	0.452	0.734
TMOD3	TPM1	9606.ENSP00000308753	9606.ENSP00000351022	0	0	0	0	0.093	0.065	0.5	0.471	0.745
TNFRSF1B	TNFSF8	9606.ENSP00000365435	9606.ENSP00000223795	0	0	0	0	0.196	0	0	0.404	0.5
