# Supplementary material for: TNFAIP8L3 regulation of the TGF-β signaling pathway affects the proportion of macrophages during tumor antigen presentation and affects the prognosis of ovarian cancer
Source: Front Mol Biosci. 2025 Apr 24;12:1566363. doi: 10.3389/fmolb.2025.1566363 (PMC12058474; doi:10.3389/fmolb.2025.1566363)
Supplement: Supplementary file 3 [file Table3.xls]

CYTOKINE	na	CCL26	TNFSF13	HGF	CCL3L1	TNFSF12	TNFRSF8	TNFSF10	CCL2	TNFSF8	TNFSF9	CCL3	TNFSF14	IL21R	CCL5	CCL4	CCL13	IL17RB	CCL11	CCL8	CCL7	TNFRSF17	TNFSF11	IL23A	CTF1	FLT1	CCL14	FLT3	CCL15	FLT3LG	FLT4	IL22	CD27	CCL18	CCL17	CCL20	CCL19	CCL21	CCL23	CCL22	TPO	CCL16	CSF2	CSF1R	TNFRSF13C	IL13RA1	CSF1	PRLR	PRL
CHEMOKINE	na	CCL26	STAT3	STAT1	STAT2	CCL3L1	CCL2	GNB4	CCL3	GRK3	GRK2	CCL5	CCL4	CX3CR1	CCL13	CCL11	CCL8	CCL7	CCL3L3	ROCK1	PTK2	BRAF	CXCL14	VAV1	CCL14	CCL15	IKBKB	AKT1	AKT2	JAK3	SHC4	DOCK2	JAK2	CCL18	GRK7	ARRB2	CCL17	ARRB1	CCL20	VAV2	CCL19	AKT3	NRAS	CCL21	CCL23	TIAM1	CCL22	GNG13	STAT5B
TGF	na	TFDP1	NOG	TNF	GDF7	INHBB	INHBC	COMP	INHBA	THBS4	RHOA	CREBBP	ROCK1	ID1	ID2	RPS6KB1	RPS6KB2	CUL1	ID4	SMAD3	MAPK3	RBL2	SMAD4	RBL1	NODAL	SMAD1	MYC	SMAD2	MAPK1	SMURF2	SMURF1	EP300	BMP8A	GDF5	SKP1	CHRD	TGFB2	TGFB1	IFNG	CDKN2B	PPP2CB	PPP2CA	PPP2R1A	ID3	SMAD5	RBX1	FST	PITX2	PPP2R1B
FOCAL	na	JUN	ELK1	HGF	PARVA	FN1	TNN	IGF1	BIRC3	XIAP	COMP	THBS4	IGF1R	DIAPH1	ITGA11	PGF	PARVG	ROCK1	PTK2	MYL7	FLT1	FLT4	AKT1	RELN	AKT2	LAMC2	MYL12A	LAMB2	LAMB3	LAMC1	LAMA4	LAMA5	LAMB1	PAK6	PIK3R5	CAPN2	LAMB4	FLNC	FLNA	FLNB	MYL2	MYLK	MYL5	PIP5K1C	MET	MYL10	BIRC2	COL11A1	LAMC3
ECM	na	GP1BA	COL6A2	COL6A3	GP1BB	COL5A2	COL6A1	LAMA1	VWF	HSPG2	TNN	FN1	ITGA9	GP9	COMP	IBSP	CD36	CHAD	GP5	VTN	THBS4	ITGA4	ITGA3	ITGA2B	ITGA7	ITGA5	COL5A1	COL4A6	ITGA11	SV2C	COL2A1	COL3A1	COL4A1	AGRN	COL4A2	COL4A4	ITGB3	ITGB4	RELN	ITGB5	ITGB6	ITGB7	LAMC2	ITGAV	ITGB1	LAMB2	SPP1	LAMB3	LAMC1
ANTIGEN	na	HLA-DOA	HLA-DOB	KLRC3	KLRD1	KLRC1	KLRC2	RFXAP	RFX5	IFNA5	IFNA4	IFNA2	IFNA1	LGMN	PSME3	CTSS	HLA-C	HLA-B	HLA-DMB	HLA-DMA	HLA-A	HSPA1L	HSPA1B	HSPA2	KIR2DS5	HLA-G	KIR3DL1	KIR3DL2	HSPA1A	RFXANK	CREB1	IFNA17	HSPA5	CD74	HSPA4	IFNA21	CTSL	IFNA6	IFI30	IFNA7	IFNA8	IFNA10	IFNA13	CIITA	IFNA14	IFNA16	KIR2DL5A	HSPA6	HLA-DRB4
JAK	na	STAT3	STAT4	STAT1	STAT2	PIAS3	TYK2	IL21R	CREBBP	SOCS5	IL23A	CTF1	STAM	SPRY4	IL22	JAK1	AKT1	AKT2	JAK3	JAK2	AKT3	STAT5B	STAT5A	TPO	STAT6	MYC	IL24	SPRED1	PIK3R5	CSF2	IL13RA2	PIAS1	IL13RA1	CNTF	PRLR	CNTFR	PRL	SOCS1	IFNE	CSF2RB	CSF2RA	IL23R	CSF3	SOCS3	CCND1	IL22RA2	CSH1	BCL2L1	CSF3R
T	na	JUN	ZAP70	MALT1	CD28	PDPK1	PPP3R2	PPP3CC	PPP3R1	PAK4	ICOS	VAV1	IKBKB	MAP3K8	MAP3K7	AKT1	AKT2	NRAS	AKT3	VAV2	CHP2	NFAT5	NFKB1	NFKBIB	NFKBIA	PAK6	NFKBIE	NCK1	CTLA4	CSF2	PIK3R5	CD4	NFATC4	MAPK14	MAPK12	NFATC3	RELA	KRAS	CD8A	CD8B	CD247	NCK2	MAP3K14	PAK5	CD3D	CD3E	PAK1	CD3G	CBLC
NETs	na	TNFAIP8L3
[truncated: 217 more columns]
